# Supplementary material for: Synthesis of tetragonal zirconia in mesoporous silica and its catalytic properties for methanol oxidative decomposition
Source: Royal Society of Chemistry journal article supplement (doi:10.1039/c7ra10942c), 2017-01-01
Supplement: c7ra10942c1.pdf [file c7ra10942c1.pdf]

## **Supporting Information**

# Synthesis of tetragonal zirconia in mesoporous silica and its catalytic property for methanol oxidative decomposition

*Naohiro Shimoda\**, *Kyoko Nakayama*, *Keiko Kiyota*, *Shigeo Satokawa\**

*Department of Materials and Life Science, Faculty of Science and Technology, Seikei University,  
3-3-1 Kichijoji-kitamachi, Musashino-shi, Tokyo 180-8633, Japan*

\* Correspondence should be addressed to:

Assistant Prof. Naohiro Shimoda

Prof. Shigeo Satokawa

Department of Materials and Life Science, Faculty of Science and Technology, Seikei University, 3-3-1

Kichijoji-kitamachi, Musashino-shi, Tokyo 180-8633, Japan

TEL: +81-422-37-3757, FAX: +81-422-37-3871

E-mail: [naohiro-shimda@st.seikei.ac.jp](mailto:naohiro-shimda@st.seikei.ac.jp), (N. Shimoda)

[satokawa@st.seikei.ac.jp](mailto:satokawa@st.seikei.ac.jp), (S. Sataokawa)

**Table S.1**

Physical properties of the synthesized KIT-6 without and with the calcination at various temperatures

| Sample    | Final calcination temperature / °C | $S_{BET}^{*1}$ / m <sup>2</sup> g <sup>-1</sup> | $V_{pore}^{*2}$                   | $V_{meso-pore}^{*3}$              | $d_{meso-pore}^{*4}$ / nm |
|-----------|------------------------------------|-------------------------------------------------|-----------------------------------|-----------------------------------|---------------------------|
|           |                                    |                                                 | / cm <sup>3</sup> g <sup>-1</sup> | / cm <sup>3</sup> g <sup>-1</sup> |                           |
| KIT-6-as  | -                                  | 840                                             | 1.13                              | 1.02                              | 8.1                       |
| KIT-6-400 | 400                                | 856                                             | 1.14                              | 1.01                              | 8.2                       |
| KIT-6-600 | 600                                | 810                                             | 1.08                              | 0.95                              | 8.2                       |
| KIT-6-800 | 800                                | 640                                             | 0.89                              | 0.81                              | 7.2                       |

\*1 BET specific surface area.

\*2 Total pore volume: estimated at  $0.99P/P_0$ .

\*3 Pore volume of meso-pores: estimated by the BJH method.

\*4 Major meso-pore diameter peaks: estimated from adsorption branch by the BJH method.

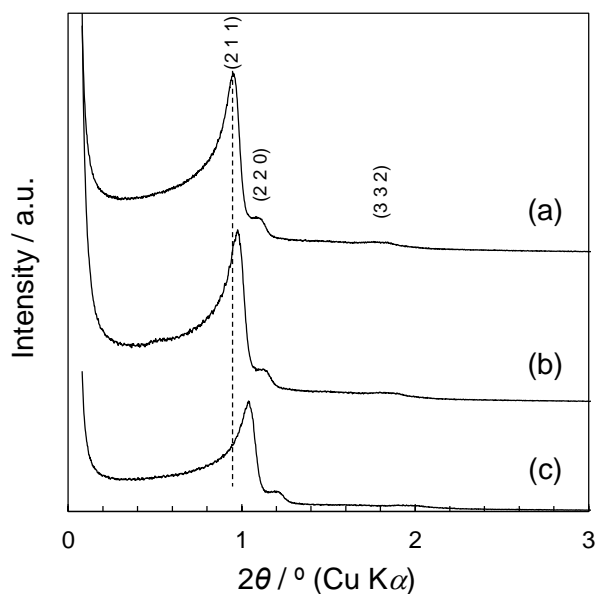

Figure S.1 Small-angle X-ray scattering patterns of the synthesized KIT-6: (a) As-prepared (calcined at 550 °C), with the re-calcination at (b) 600 °C, and (c) 800 °C.

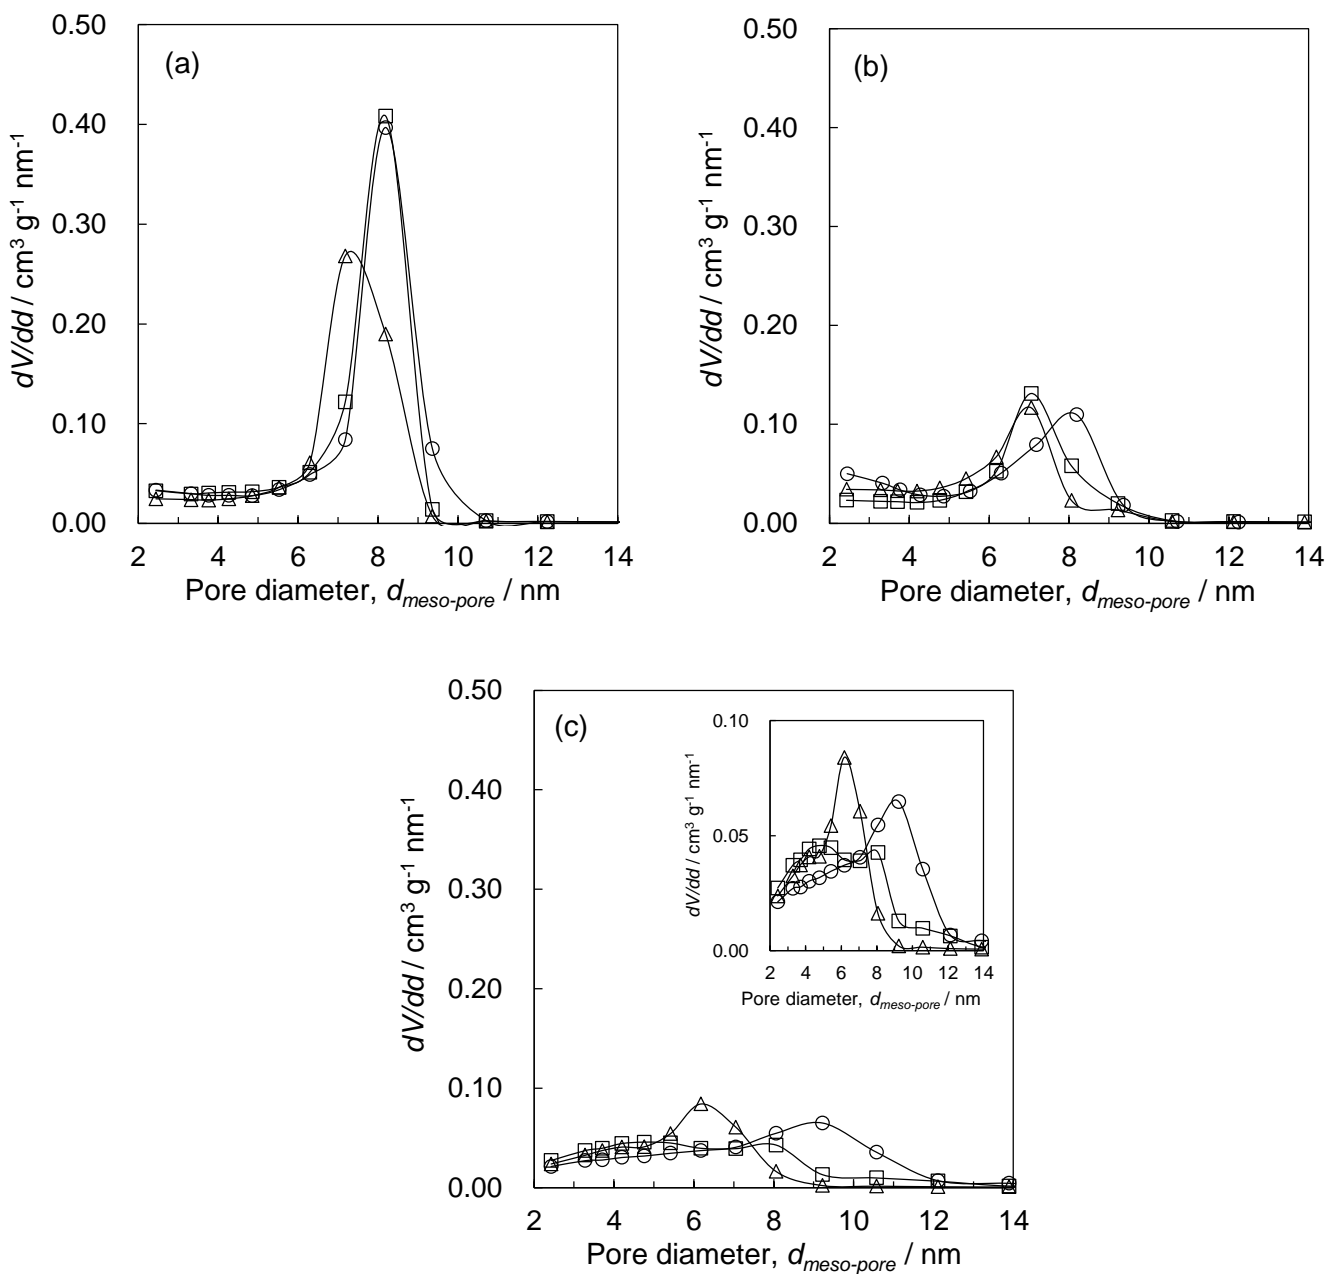

Figure S.2 Pore size distribution by the BJH method of (a) Z20N/K(T), (b) Z50N/K(T), and (c) Z80N/K(T):  $T$  = (○) 400, (□) 600, (△) 800.

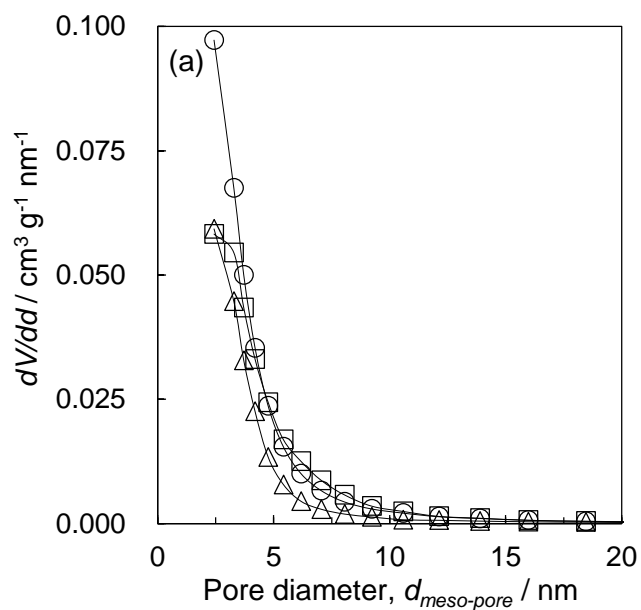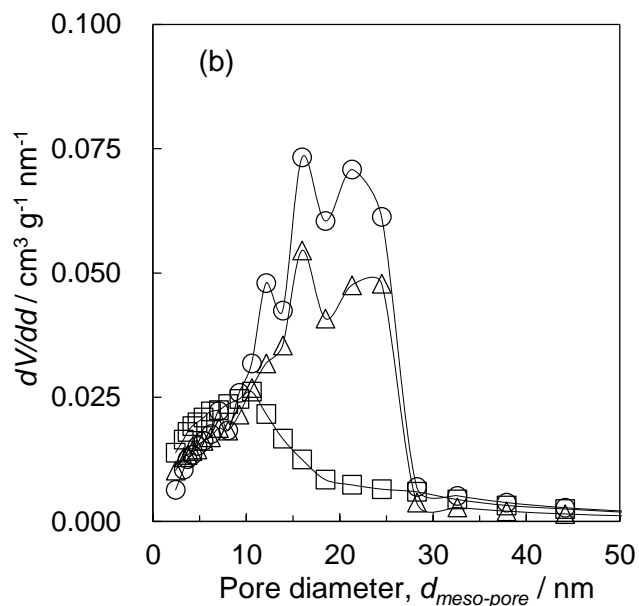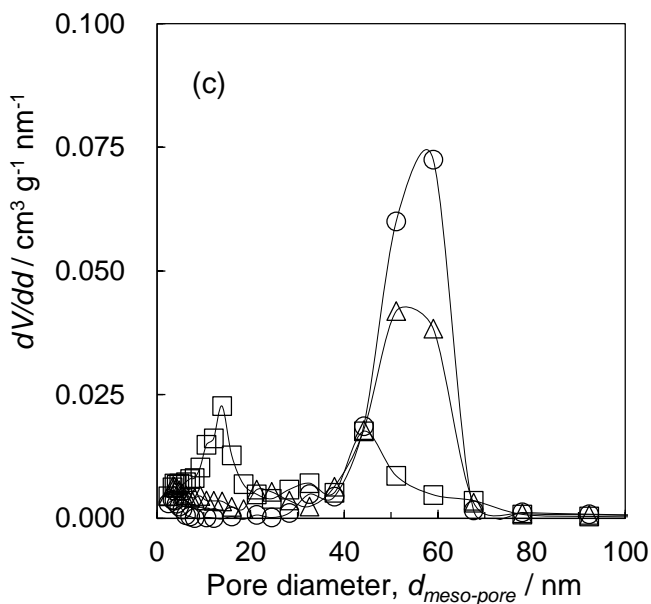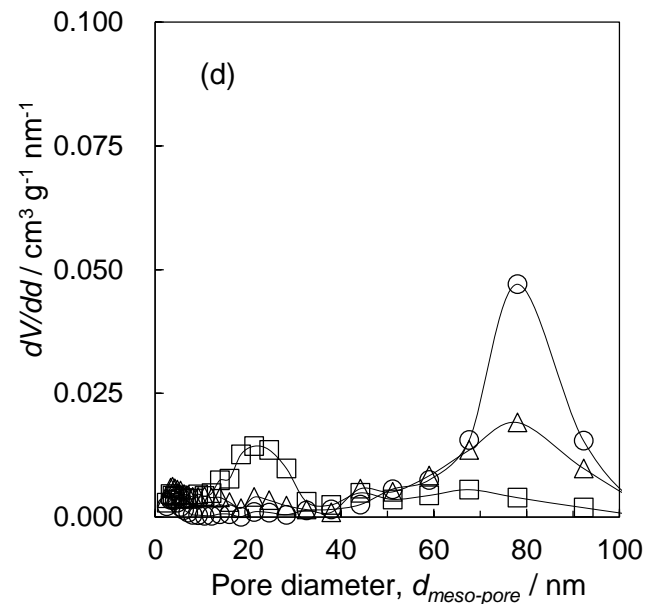

Figure S.3 Pore size distribution by the BJH method of (a) ZNX/Q-3, (b) ZNX/Q-10, (c) ZNX/Q-30, and (d) ZNX/Q-50; X = (○) 0, (△) 20, (□) 50.

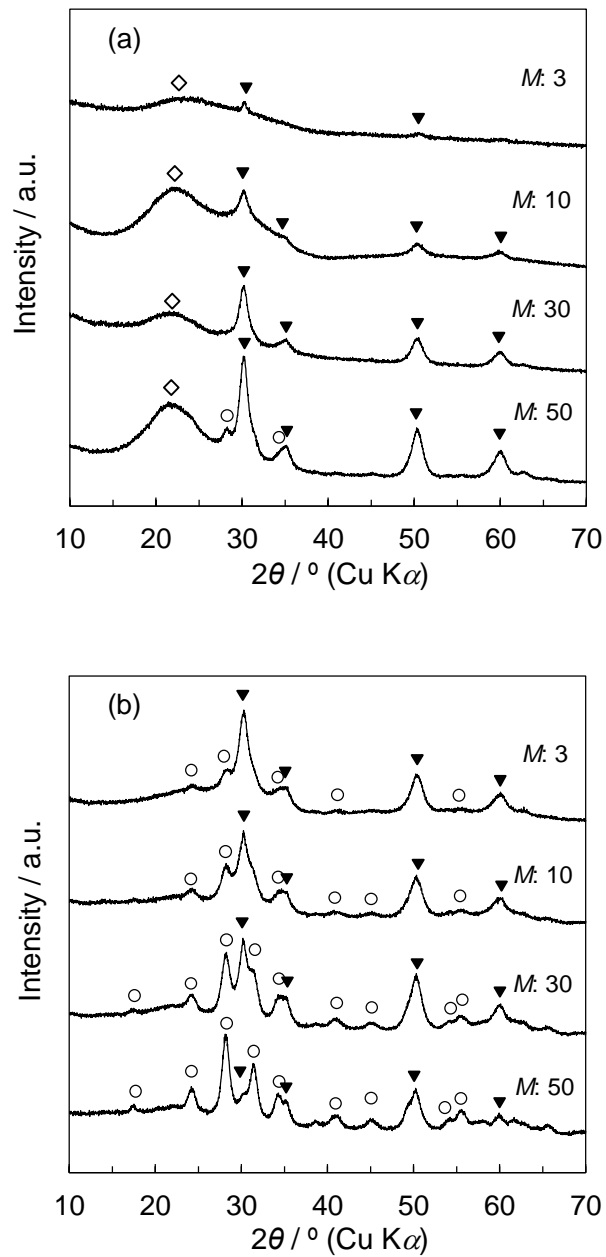

Figure S.4 Wide-angle XRD patterns of the  $\text{ZrO}_2/\text{SiO}_2$  composites: (a) Z20N/Q- $M$  and (b) Z50N/Q- $M$ ;  $M$ : 3, 10, 30, 50; ( $\circ$ )  $\text{ZrO}_2$ -monoclinic, ( $\blacktriangledown$ )  $\text{ZrO}_2$ -tetragonal, ( $\diamond$ )  $\text{SiO}_2$ .
